# Supplementary material for: Bronchoalveolar lavage fluid dilution in ICU patients: what we should know and what we should do
Source: Crit Care. 2019 Jan 24;23:23. doi: 10.1186/s13054-018-2300-x (PMC6344997; doi:10.1186/s13054-018-2300-x)
Supplement: Supplementary file 1 — Guidelines of the American Thoracic Society were followed during the bronchoalveolar lavage (BAL) procedure. Selection of the segment for BAL was guided by chest x-ray changes. The right middle lobe or lingual lobe was selected when diffuse infiltrates were present. Five 20-mL aliquots of sterile saline were instilled and aspirated gently in each patient. The total volume of the retrieved liquid should be greater than or equal to 30% of the total volume of the instilled saline. (ZIP 492 kb) [file 13054_2018_2300_MOESM1_ESM.zip › YYC2P1SR-3349-0BCC-6ACF-0B48-EA59.pdf]

---

## Nature Research Editing Service Certification

---

This is to certify that the manuscript titled Bronchoalveolar lavage fluid dilution in ICU patients: what we should know and what we should do was edited for English language usage, grammar, spelling and punctuation by one or more native English-speaking editors at Nature Research Editing Service. The editors focused on correcting improper language and rephrasing awkward sentences, using their scientific training to point out passages that were confusing or vague. Every effort has been made to ensure that neither the research content nor the authors' intentions were altered in any way during the editing process.

Documents receiving this certification should be English-ready for publication; however, please note that the author has the ability to accept or reject our suggestions and changes. To verify the final edited version, please visit our verification page. If you have any questions or concerns over this edited document, please contact Nature Research Editing Service at support@as.springernature.com.

**Manuscript title:** Bronchoalveolar lavage fluid dilution in ICU patients: what we should know and what we should do

**Authors:** Yuetian Yu, Chunyan Liu, Zhongheng Zhang, Hui Shen, Yujie Li, Liangjing Lu, Yuan Gao

**Key:** 3349-0BCC-6ACF-0B48-EA59

This certificate may be verified at [secure.authorservices.springernature.com/certificate/verify](https://secure.authorservices.springernature.com/certificate/verify).

---

Nature Research Editing Service is a service from Springer Nature, one of the world's leading research, educational and professional publishers. We have been a reliable provider of high-quality editing since 2008.

Nature Research Editing Service comprises a network of more than 900 language editors with a range of academic backgrounds. All our language editors are native English speakers and must meet strict selection criteria. We require that each editor has completed or is completing a Masters, Ph.D. or M.D. qualification, is affiliated with a top US university or research institute, and has undergone substantial editing training. To ensure we can meet the needs of researchers in a broad range of fields, we continually recruit editors to represent growing and new disciplines.

Uploaded manuscripts are reviewed by an editor with a relevant academic background. Our senior editors also quality-assess each edited manuscript before it is returned to the author to ensure that our high standards are maintained.
